# Supplementary material for: A2B Adenosine Receptor Enhances Chemoresistance of Glioblastoma Stem-Like Cells under Hypoxia: New Insights into MRP3 Transporter Function
Source: MDPI journal article supplement (doi:10.3390/ijms23169022), 2022-08-12
Supplement: s1 [file s1]

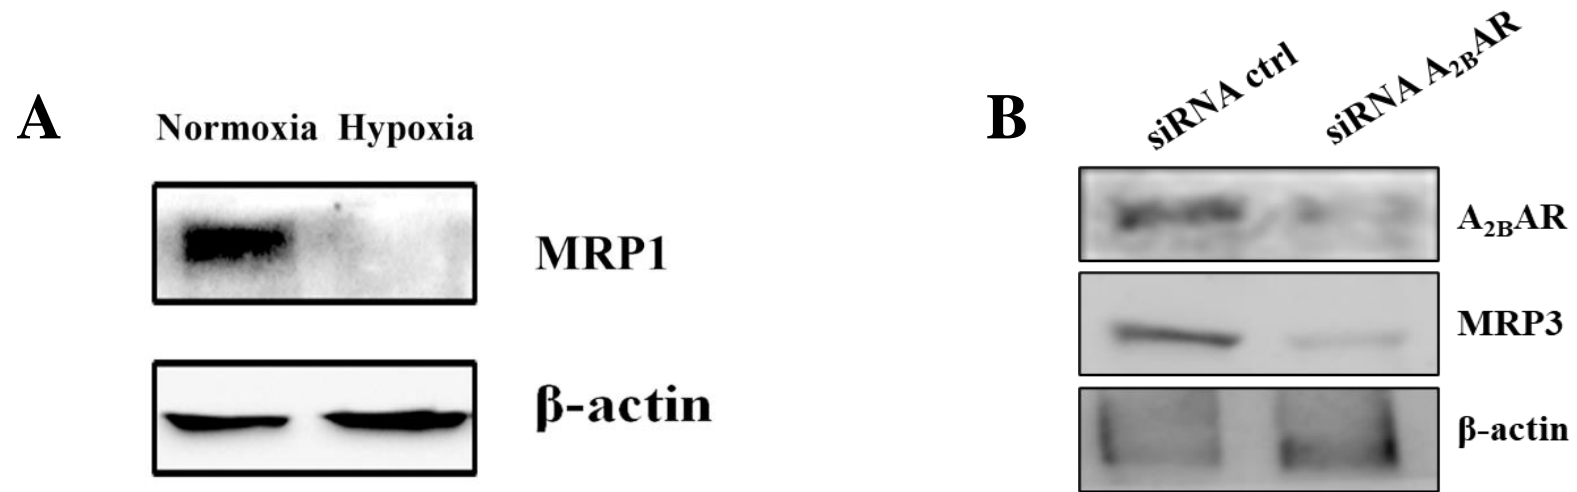

**Figure supplementary S1:** A) Mrp1 protein expresión in GSCs under normoxia and hypoxia conditions. B) A<sub>2B</sub>AR and MRP3 knockdown was confirmed by western blot.

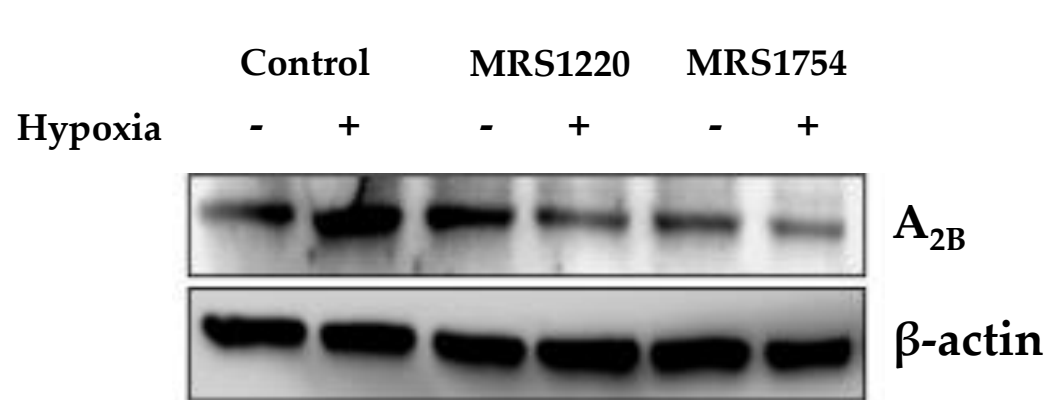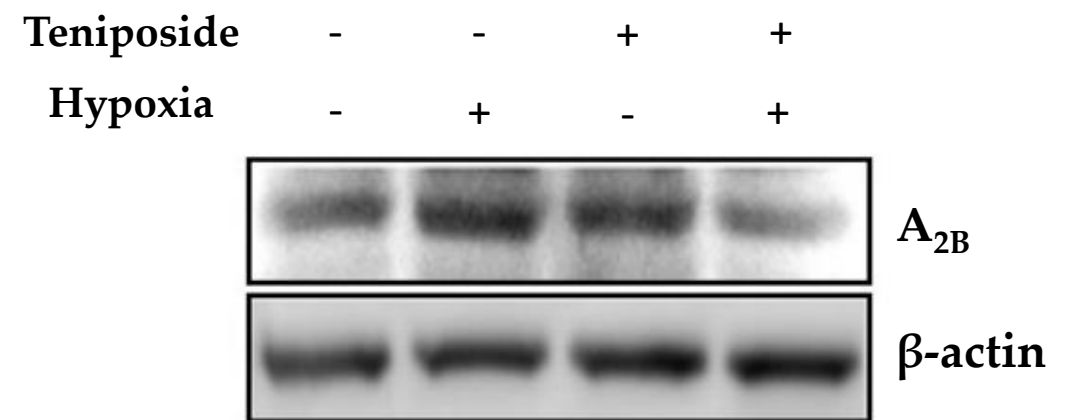

**Figure supplementary S2:**  $A_{2B}$ AR and MRP3 knockdown was confirmed by western blot.
